# Supplementary material
Source: HighWire-hosted journal article supplement (https://www.canjsurg.ca/highwire/filestream/96748/field_highwire_adjunct_files/0/cjs-006614-1-at.pdf)
Supplement: cjs-006614-1-at.pdf [file cjs-006614-1-at.pdf]

**Appendix** to Austin R, Wanzel KR. Supply versus demand: a review of application trends to Canadian surgical training programs. *Can J Surg* 2015

DOI: 10.1503/cjs.006614

Copyright © 2015 The Author(s) or their employer(s). To receive this resource in an accessible format, please contact us at [cmajgroup@cmaj.ca](mailto:cmajgroup@cmaj.ca).

**Table S1. Rank order of the change in average percentage of graduating medical school classes selecting a surgical specialty as their first choice residency program; 2008–13 versus 2002–07**

| Rank | Undergraduate medical school | Program | Change (%) | p value | Rank | Undergraduate medical school | Program | Change (%) | p value |
|------|------------------------------|---------|------------|---------|------|------------------------------|---------|------------|---------|
| 1    | Memorial                     | U       | 1.602      | 0.007   | 40   | McGill                       | E       | -0.363     | > 0.99  |
| 2    | Saskatchewan                 | G       | 1.155      | 0.23    | 41   | Calgary                      | P       | -0.467     | 0.53    |
| 3    | Western Ontario              | N       | 0.950      | 0.012   | 42   | Saskatchewan                 | N       | -0.467     | 0.65    |
| 4    | McMaster                     | G       | 0.945      | 0.020   | 43   | McGill                       | O       | -0.483     | 0.41    |
| 5    | Alberta                      | P       | 0.917      | 0.08    | 44   | Alberta                      | U       | -0.496     | 0.74    |
| 6    | Alberta                      | O       | 0.817      | 0.09    | 45   | British Columbia             | U       | -0.581     | 0.40    |
| 7    | Ottawa                       | O       | 0.650      | 0.21    | 46   | Calgary                      | U       | -0.647     | 0.65    |
| 8    | Memorial                     | P       | 0.633      | 0.53    | 47   | McGill                       | U       | -0.715     | 0.42    |
| 9    | Dalhousie                    | P       | 0.533      | 0.52    | 48   | British Columbia             | N       | -0.733     | 0.12    |
| 10   | British Columbia             | G       | 0.521      | 0.30    | 49   | Western Ontario              | O       | -0.750     | 0.45    |
| 11   | Memorial                     | O       | 0.483      | 0.76    | 50   | Ottawa                       | E       | -0.766     | 0.49    |
| 12   | Western Ontario              | E       | 0.438      | 0.17    | 51   | British Columbia             | O       | -0.767     | 0.36    |
| 13   | Calgary                      | E       | 0.400      | 0.47    | 52   | Western Ontario              | U       | -0.794     | 0.76    |
| 14   | McMaster                     | U       | 0.353      | 0.18    | 53   | Dalhousie                    | G       | -0.794     | 0.88    |
| 15   | Ottawa                       | P       | 0.350      | 0.36    | 54   | British Columbia             | P       | -0.800     | 0.35    |
| 16   | Toronto                      | N       | 0.283      | 0.49    | 55   | Dalhousie                    | E       | -0.844     | 0.72    |
| 17   | Dalhousie                    | N       | 0.267      | 0.55    | 56   | McMaster                     | E       | -0.847     | 0.38    |
| 18   | Calgary                      | N       | 0.250      | 0.64    | 57   | McMaster                     | N       | -0.900     | 0.07    |
| 19   | Queen's                      | O       | 0.250      | 0.76    | 58   | Manitoba                     | E       | -0.915     | 0.29    |
| 20   | Manitoba                     | U       | 0.200      | 0.72    | 59   | Queen's                      | E       | -0.983     | 0.06    |
| 21   | Memorial                     | E       | 0.174      | 0.51    | 60   | Alberta                      | N       | -1.033     | 0.014   |
| 22   | Manitoba                     | N       | 0.150      | 0.84    | 61   | McGill                       | P       | -1.117     | 0.07    |
| 23   | McMaster                     | P       | 0.133      | 0.83    | 62   | McMaster                     | O       | -1.117     | 0.11    |
| 24   | Saskatchewan                 | O       | 0.117      | 0.93    | 63   | Western Ontario              | G       | -1.174     | 0.90    |
| 25   | Dalhousie                    | U       | 0.102      | 0.66    | 64   | Toronto                      | E       | -1.198     | 0.033   |
| 26   | Queen's                      | P       | 0.100      | 0.87    | 65   | Memorial                     | G       | -1.329     | 0.67    |
| 27   | Queen's                      | N       | 0.100      | 0.82    | 66   | Manitoba                     | G       | -1.361     | 0.58    |
| 28   | Toronto                      | O       | 0.067      | 0.92    | 67   | McGill                       | G       | -1.368     | 0.91    |
| 29   | Dalhousie                    | O       | 0.033      | 0.98    | 68   | Alberta                      | G       | -1.458     | 0.66    |
| 30   | Calgary                      | O       | 0.000      | > 0.99  | 69   | Toronto                      | P       | -1.533     | 0.006   |
| 31   | Saskatchewan                 | E       | -0.013     | 0.72    | 70   | Toronto                      | U       | -1.648     | 0.012   |
| 32   | Saskatchewan                 | U       | -0.045     | 0.54    | 71   | Alberta                      | E       | -1.680     | 0.009   |
| 33   | Western Ontario              | P       | -0.117     | 0.83    | 72   | Manitoba                     | O       | -1.700     | 0.09    |
| 34   | British Columbia             | E       | -0.166     | 0.822   | 73   | Queen's                      | G       | -1.742     | 0.26    |
| 35   | Ottawa                       | N       | -0.167     | 0.61    | 74   | Toronto                      | G       | -1.939     | 0.38    |
| 36   | Manitoba                     | P       | -0.167     | 0.79    | 75   | Calgary                      | G       | -1.943     | 0.23    |
| 37   | Saskatchewan                 | P       | -0.183     | 0.89    | 76   | Ottawa                       | U       | -2.016     | 0.049   |
| 38   | Memorial                     | N       | -0.217     | 0.70    | 77   | McGill                       | N       | -2.067     | 0.019   |
| 39   | Queen's                      | U       | -0.242     | 0.59    | 78   | Ottawa                       | G       | -2.347     | 0.09    |

E = Otolaryngology; G = General surgery; N =Neurosurgery; O = Orthopedic surgery; P = Plastic surgery; U = Urology.

**Appendix** to Austin R, Wanzel KR. Supply versus demand: a review of application trends to Canadian surgical training programs. *Can J Surg* 2015

DOI: 10.1503/cjs.006614

**Table S2. Rank-order of the change in average percentage of graduating medical school classes selecting a surgical specialty as their first-choice residency program, by academic institution; 2008-2013 vs 2002-2007**

| Alberta |         | Calgary |        | Dalhousie    |        | Manitoba |         | McGill           |         | McMaster |        | Memorial |        |
|---------|---------|---------|--------|--------------|--------|----------|---------|------------------|---------|----------|--------|----------|--------|
| Program | Change  | Program | Change | Program      | Change | Program  | Change  | Program          | Change  | Program  | Change | Program  | Change |
| E       | -1.680* | E       | 0.400  | E            | -0.844 | E        | -0.915  | E                | -0.363  | E        | -0.847 | E        | 0.174  |
| G       | -1.458  | G       | -1.943 | G            | -0.794 | G        | -1.361  | G                | -1.368  | G        | 0.945* | G        | -1.329 |
| N       | -1.033* | N       | 0.250  | N            | 0.267  | N        | 0.150   | N                | -2.067* | N        | -0.900 | N        | -0.217 |
| O       | 0.817   | O       | 0.000  | O            | 0.033  | O        | -1.700  | O                | -0.483  | O        | -1.117 | O        | 0.483  |
| P       | 0.917   | P       | -0.467 | P            | 0.533  | P        | -0.167  | P                | -1.117  | P        | 0.133  | P        | 0.633  |
| U       | -0.496  | U       | -0.647 | U            | 0.102  | U        | 0.200   | U                | -0.715  | U        | 0.353  | U        | 1.602* |
| Ottawa  |         | Queens  |        | Saskatchewan |        | Toronto  |         | British Columbia |         | Western  |        |          |        |
| Program | Change  | Program | Change | Program      | Change | Program  | Change  | Program          | Change  | Program  | Change |          |        |
| E       | -0.766  | E       | -0.983 | E            | -0.013 | E        | -1.198* | E                | -0.166  | E        | 0.438  |          |        |
| G       | -2.347  | G       | -1.742 | G            | 1.155  | G        | -1.939  | G                | 0.521   | G        | -1.174 |          |        |
| N       | -0.167  | N       | 0.100  | N            | -0.467 | N        | 0.283   | N                | -0.733  | N        | 0.950* |          |        |
| O       | 0.650   | O       | 0.250  | O            | 0.117  | O        | 0.067   | O                | -0.767  | O        | -0.750 |          |        |
| P       | 0.350   | P       | 0.100  | P            | -0.183 | P        | -1.533* | P                | -0.800  | P        | -0.117 |          |        |
| U       | -2.016* | U       | -0.242 | U            | -0.045 | U        | -1.648* | U                | -0.581  | U        | -0.794 |          |        |

E = Otolaryngology; G = General surgery; N = Neurosurgery; O = Orthopedic surgery; P = Plastic surgery; U = Urology.  
 \* $p < 0.05$ .
